# Supplementary material for: Analysis of Molar Substitution of Hydroxybutyl Group by Zeisel Reaction in Starch Ethers
Source: MDPI journal article supplement (doi:10.3390/molecules26185509), 2021-09-11
Supplement: s1 [file s1]

## SUPPORTING INFORMATION

### Analysis of Molar Substitution of Hydroxybutyl Group by Zeisel Reaction in starch ethers

*Xiao-Lei Man<sup>1</sup>, Wei-Kang Peng<sup>2</sup>, Jun Chen<sup>3</sup>, Xue-Li Liu<sup>24\*</sup>*

<sup>1</sup> *Geosynthetics Applied Research Centre, College of Civil and Architecture Engineering, Chuzhou University, Anhui 239012, China.*

<sup>2</sup> *College of Material and Chemical Engineering, Chuzhou University, Anhui 239012, China.*

<sup>3</sup> *College of Biotechnology and Pharmaceutical Engineering, West Anhui University, Anhui 237012, China.*

<sup>4</sup> *School of Chemistry and Chemical Engineering, AnHui University, He Fei, 230601, China*

*\* Correspondence, e-mail: n\_xueli@163.com.*

| Table of Contents                         | Page |
|-------------------------------------------|------|
| 1. General experimental procedure.....    | 1    |
| 2. Experimental data and spectrogram..... | 1    |

## 1. Experimental Procedures

### 1.1 Synthesis of $\delta$ -Hydroxybutyl starch ( $\delta$ -HBS)

Briefly, corn starch (10g) was suspended in isopropyl alcohol, then the solution was initiated by addition of NaOH (0.6g) for 1h under stirring. A predetermined amount of 4-chlorobutan-1-ol (1.5mL, 2.5mL, 3.5mL) added to the flask. The reaction was carried out at 50°C for 20h. Then the suspension was cooled and neutralized to pH 7.0 with 1 M hydrochloric acid. Collected the product by suction filtration and washed on the filter with 95% ethanol aqueous solution three times, and then dried in a vacuum oven.

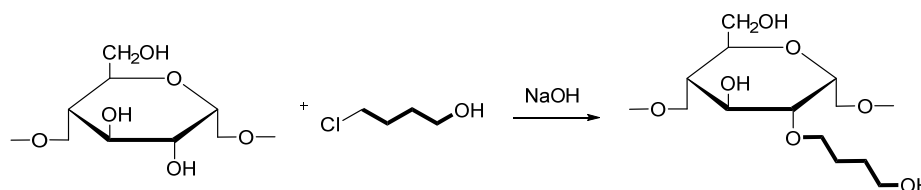

**Scheme S1.** Synthesis pathway of the  $\delta$ -Hydroxybutyl starch.

## 2. Experimental data and spectrogram

### 2.1 FTIR Spectroscopy of $\delta$ -Hydroxybutyl starch

Briefly, A typical FTIR spectrum of  $\delta$ -HBS is shown in Figure 1, together with a spectrum of unmodified corn starch. In comparison with unmodified corn starch, the difference between  $\delta$ -HBS and starch spectrum was conspicuous. The IR spectrum of  $\delta$ -HBS showed the distinct absorption bands appeared at 3394 cm<sup>-1</sup>, which was assigned to stretching vibration of -OH. The absorption bands became narrower and shifted to higher wave number. The weak peak toward 2929 cm<sup>-1</sup> was attributed to the C-H asymmetric stretching vibration. High density of -CH<sub>2</sub> groups

were in the  $\delta$ -HBS polymer structure. A large quantity of  $-\text{CH}_2$  groups were fetched into HBS by etherification, the peak of the  $\delta$ -HBS with higher MS at  $1417\text{ cm}^{-1}$  which was corresponding to bending vibration of  $-\text{CH}_2$  showed significant change. The absorption peak of the C-O stretching of the ether group was observed at  $1157\text{ cm}^{-1}$  as shown in Figure 1. In addition, the absorption peak of C-O-C glycosidic bonds of AGU of starch molecules at  $860\text{ cm}^{-1}$  was observed to remain intact, suggesting that the aforementioned molecules were not degraded after etherification. Therefore, the results of FTIR spectra further proved that  $\delta$ -HBS was synthesized.

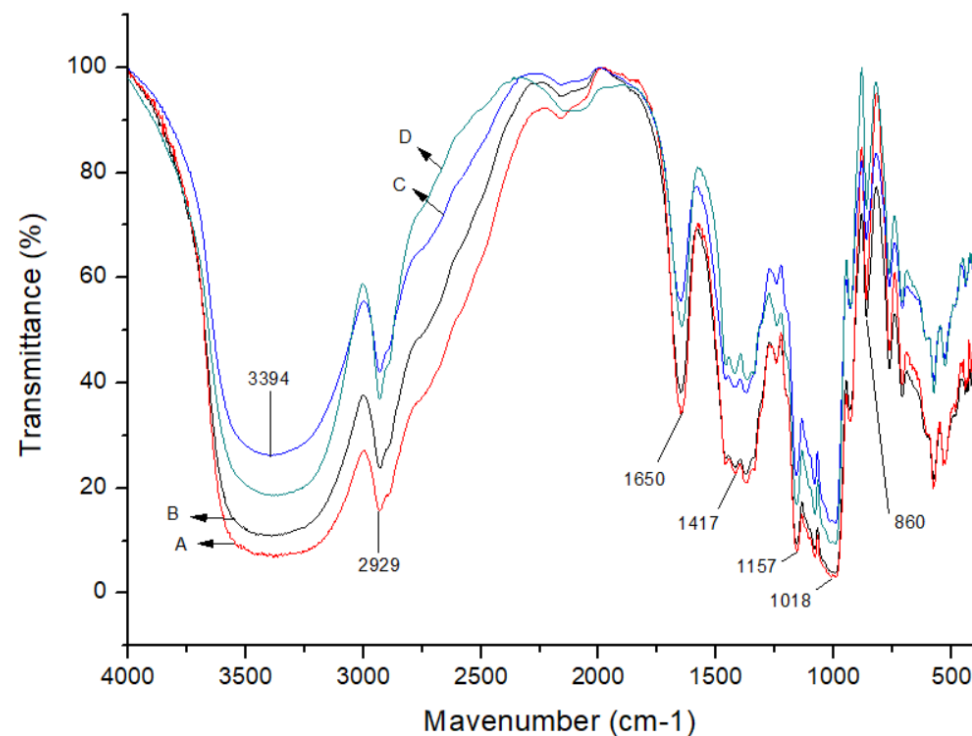

**Figure S1.** FTIR spectra of  $\delta$ -HBS at D) MS = 0.12, C) MS = 0.076, B) MS = 0.042, and A) unmodified starch.

## 2.2 $^1\text{H}$ NMR of $\delta$ -Hydroxybutyl starch

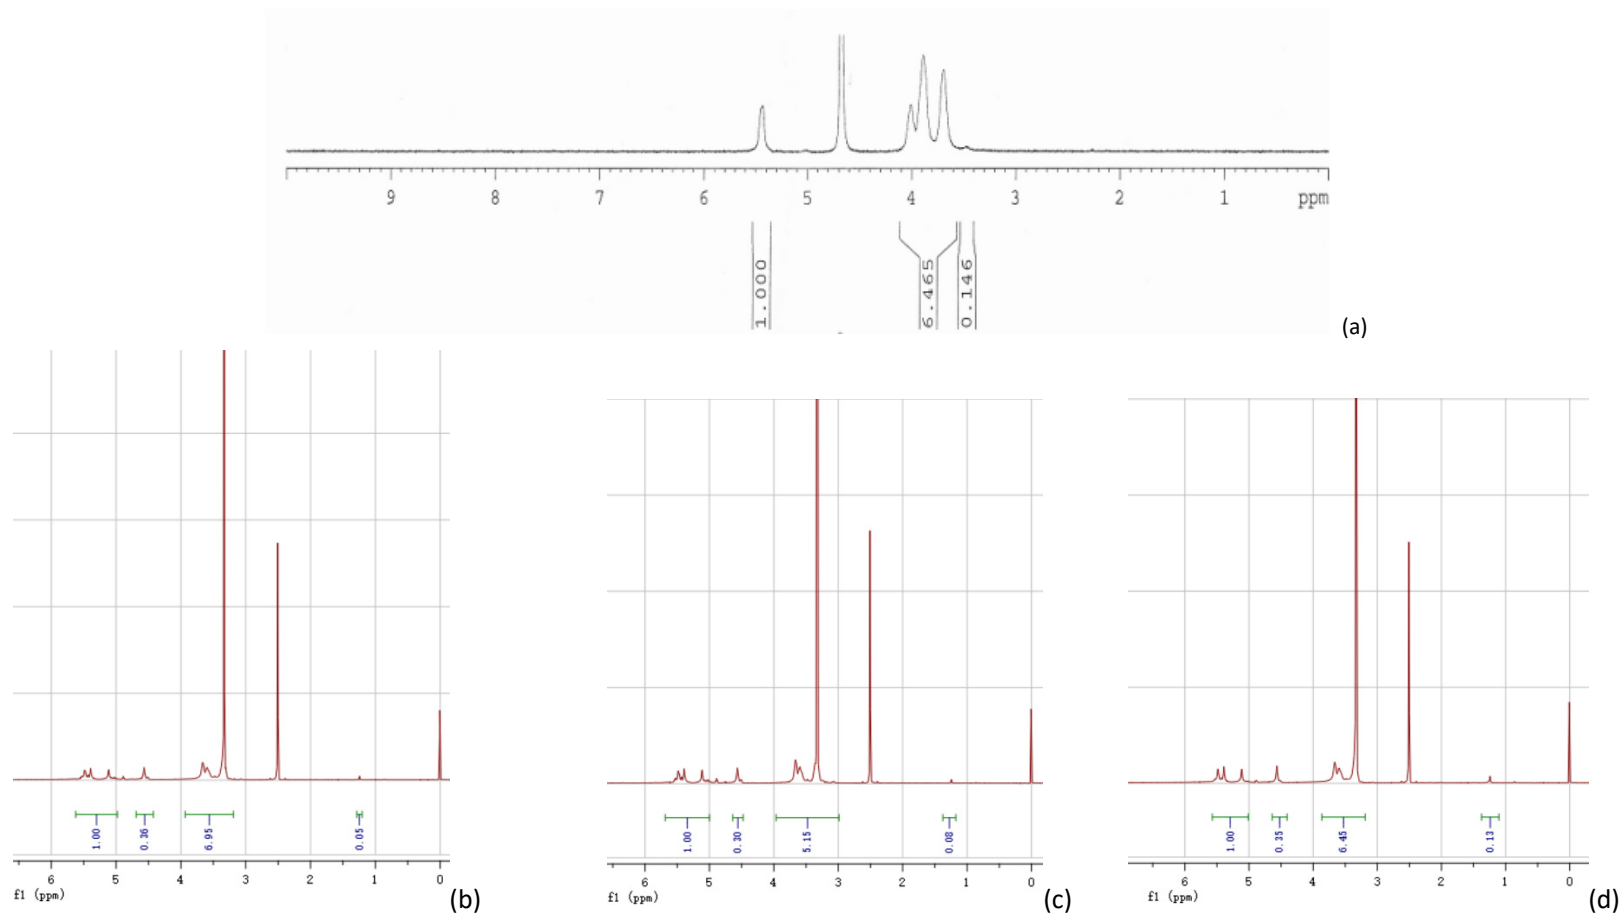

the H-NMR spectrum of unmodified starch

**Figure S2.** H-NMR spectra of  $\delta$ -HBS at D) MS = 0.12, C) MS = 0.076, B) MS = 0.042, and A) unmodified starch.

The  $^1\text{H}$  NMR spectral signals between 3.4 and 4.1 ppm (Fig.2a) corresponded to the protons of the constituent repeating  $\alpha$ -D-glucopyranosyl units of unmodified starch, except for the proton of acetal (O-C(H)-O) observed as a singlet at 5.4 ppm. Owing to the introduction of -OCH<sub>2</sub>CH<sub>2</sub>CH<sub>2</sub>CH<sub>2</sub>OH, the characteristic peak of the proton of acetal (O-C(H)-O) was shifted and split, and the result in multiple-peak separation between 5.1 and 5.5 ppm. The presence of spectral signal at 1.24 ppm (Fig.2b-2d) confirmed the presence of methylene proton in -OCH<sub>2</sub>CH<sub>2</sub>CH<sub>2</sub>CH<sub>2</sub>OH.

### **2.3 Gas chromatography**

**The discussion please see the article.**

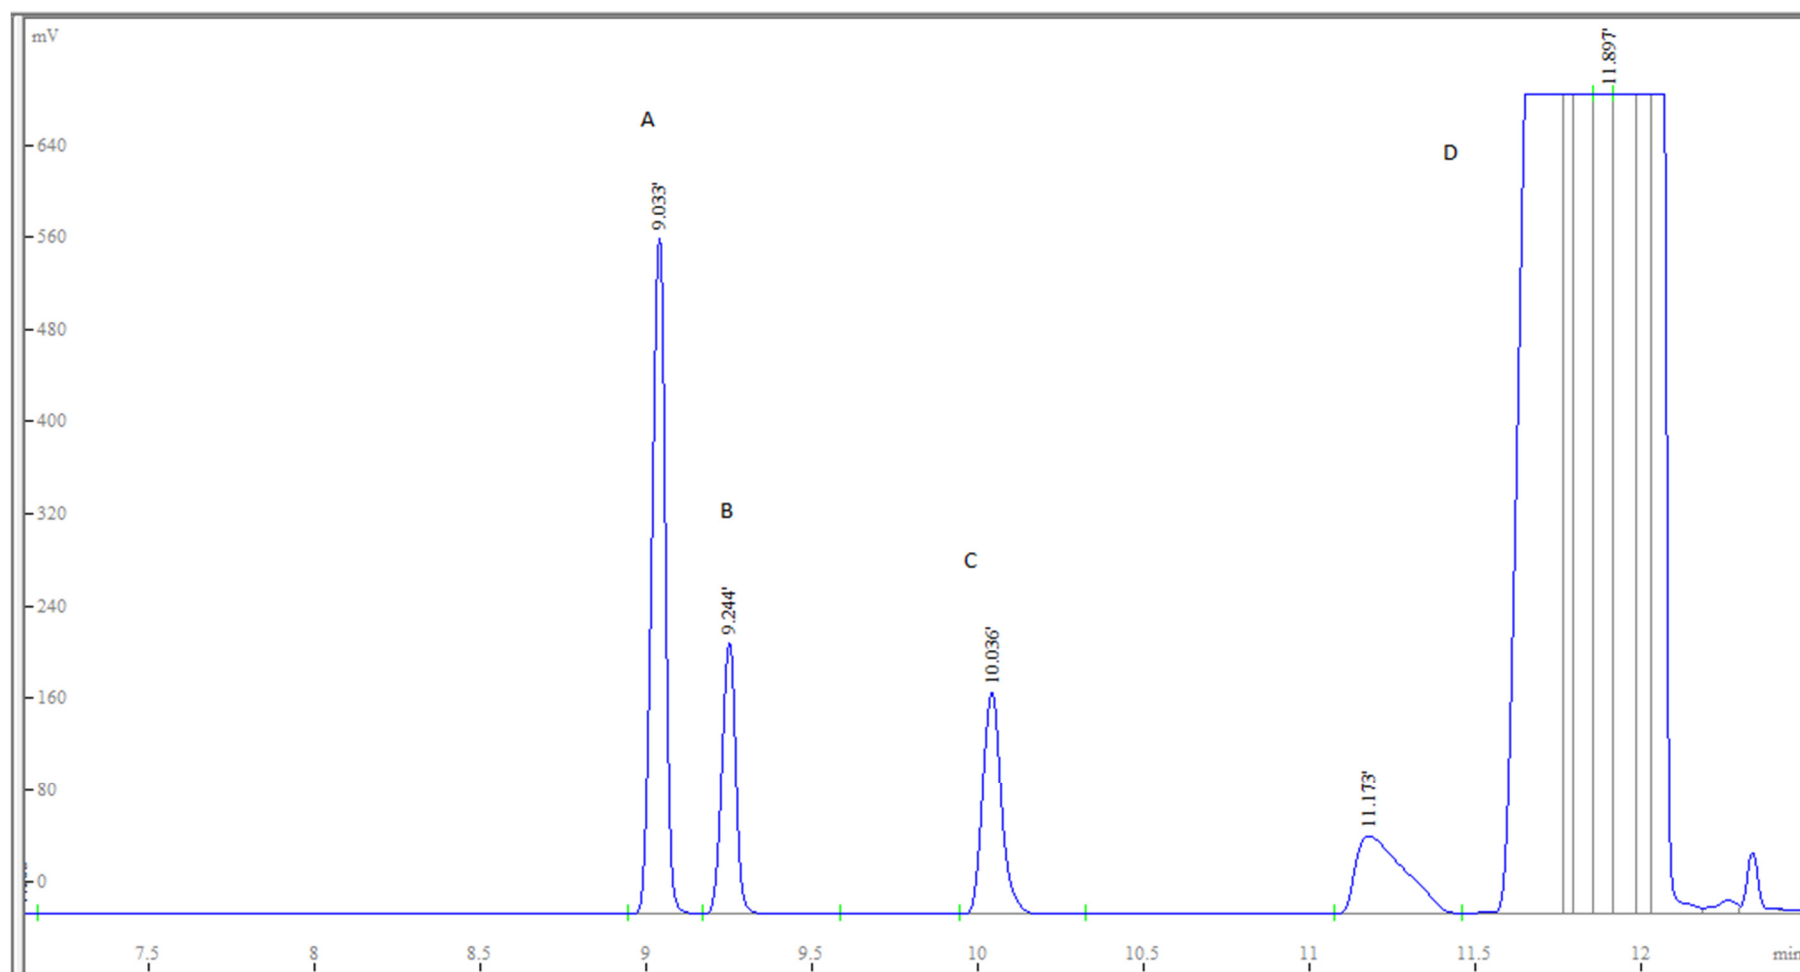

**Figure S3.** Chromatogram of iodobutanes, toluene and o-xylene solvent. (A) toluene; (B) 2-iodobutane; (C) 1-iodobutane; (D) o-xylene

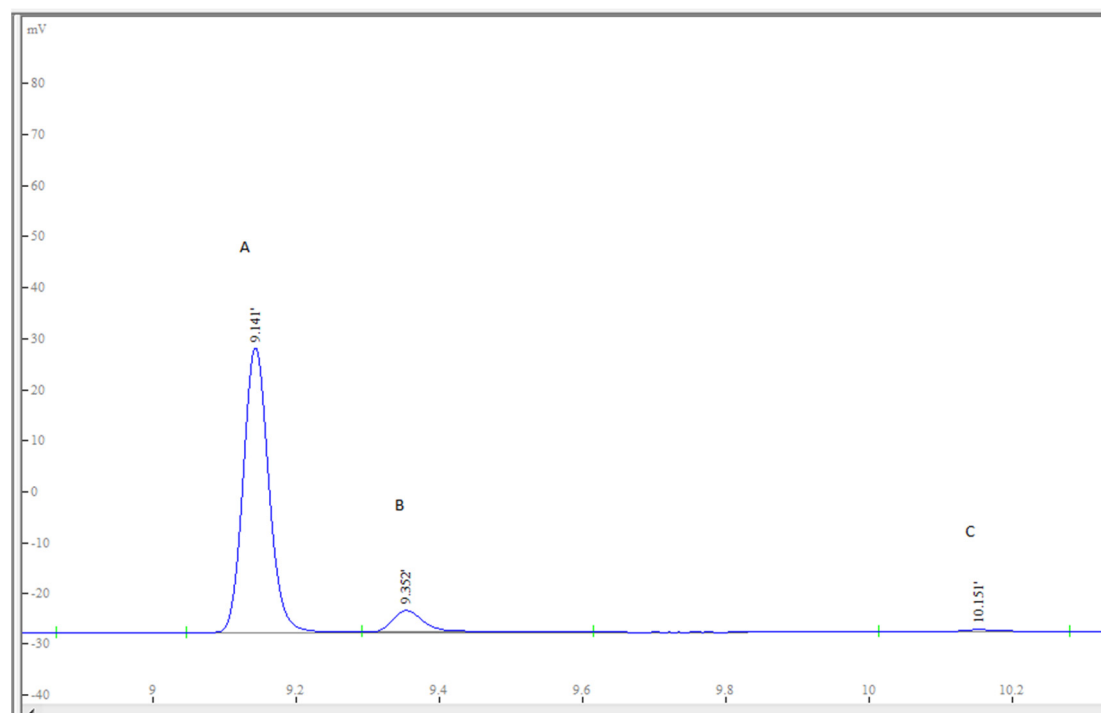

**Figure S4.** The validation experiment of the final hydrolysis product. (A) toluene; (B) 2-iodobutane; (C) 1-iodobutane.

By chromatographing the reaction products over the course of the experiment, one can at least partially understand the chemistry of the cleavage. The peak area ratio of B/C is 33.9:1, which indicated that 2-iodobutane is the main hydrolysis product. The exact quantity of final hydrolysis product can be calculated by gathering B and C.

**Table S1.** Results of the precision determination of the proposed method

| No.                       | 1          | 2     | 3     | 4     | 5     | 6     |
|---------------------------|------------|-------|-------|-------|-------|-------|
| $A_{C_4H_9I}/A_{Toluene}$ | 0.345      | 0.344 | 0.346 | 0.351 | 0.341 | 0.352 |
| average ratio             | 0.3465     |       |       |       |       |       |
| standard deviation        | 0.00386221 |       |       |       |       |       |
| RSD                       | 1.11       |       |       |       |       |       |

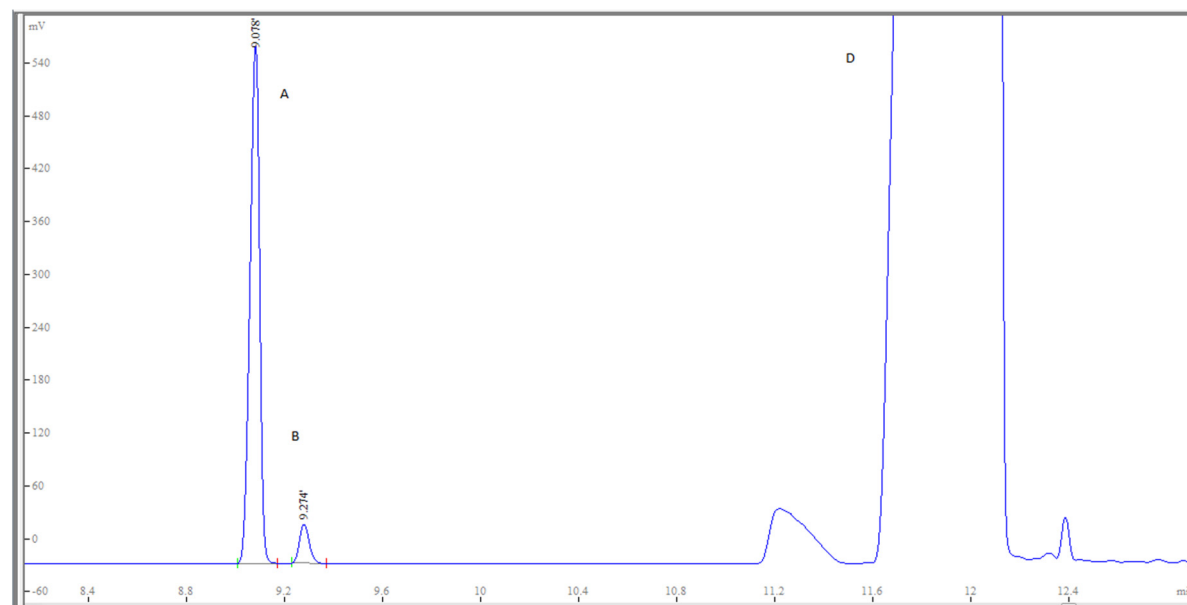



(a)

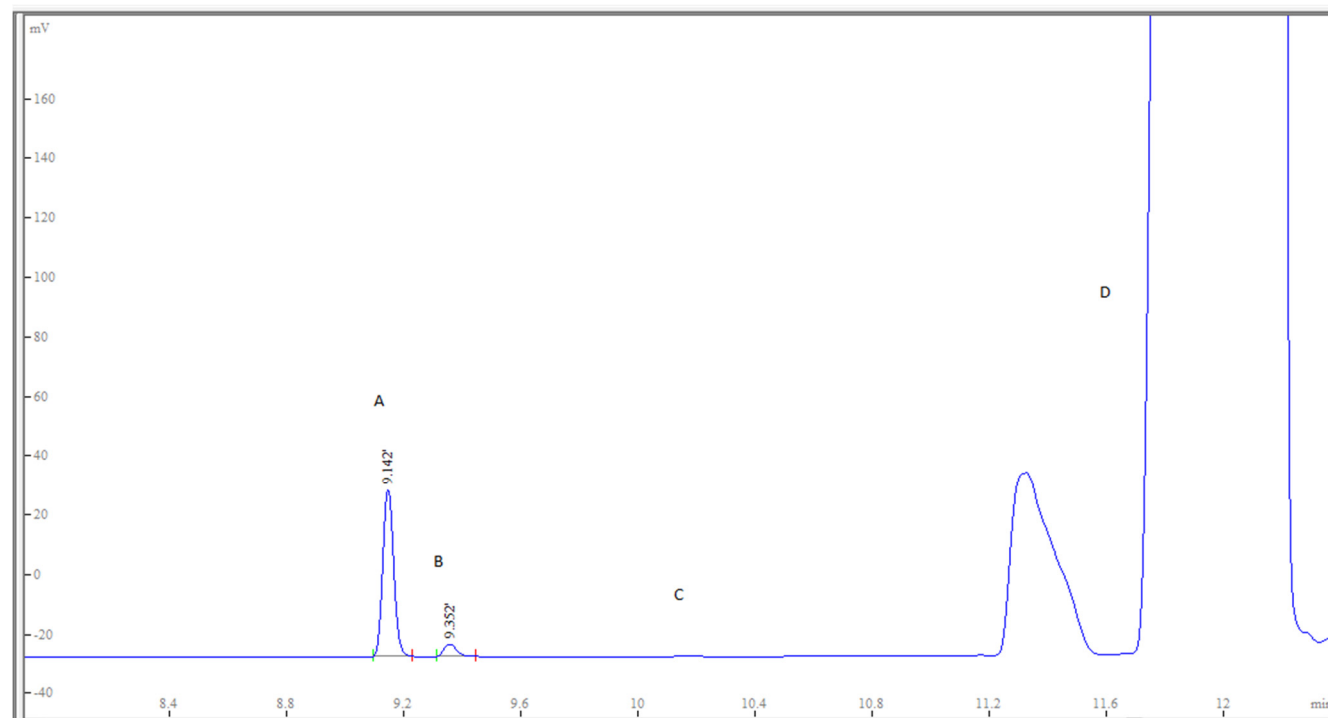

(b)

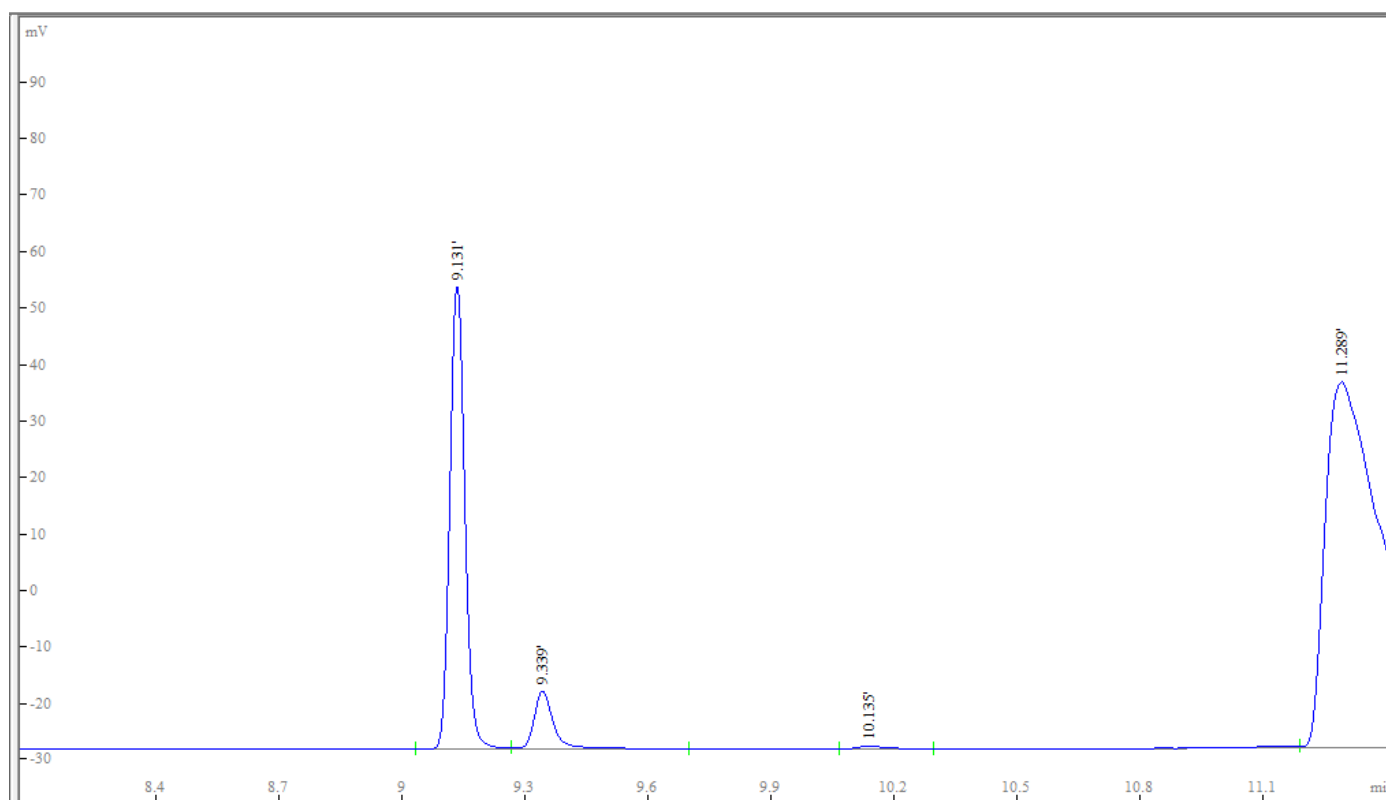

(c)

**Figure S5.** (a) A chromatogram of the reaction of entry 1 in table 2; (b) A chromatogram of the reaction of entry 2 in table 2; (c) A chromatogram of the reaction of entry 3 in table 2; (A) toluene; (B) 2-iodobutane; (C) 1-iodobutane; (D) o-xylene

## 2.2 Gas chromatography (additional experiment of table 1 with some modification)

The gas chromatography (G5, puri general instrument Co., Ltd., Beijing, China) equipped with FID detector and the capillary chromatographic column was **SE-30** (30m×0.32mm× 0.25μm). The GC operating condition was as follows: The injector was held at 200°C, The initial oven temperature of **100°C** was held for **6 min**, then which was increased to **200°C at 10°C/min**. This temperature was held for 4 min, too. The injection volume was 2 μL. The detector temperature was 250°C.

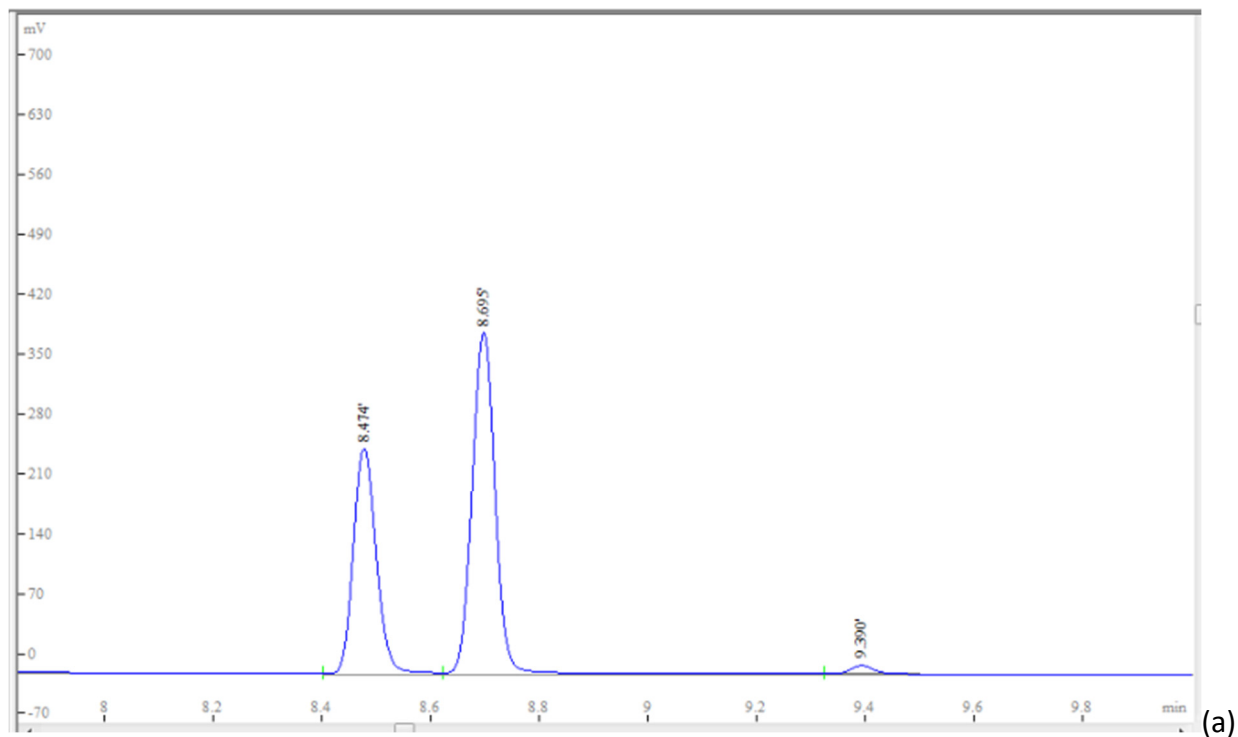

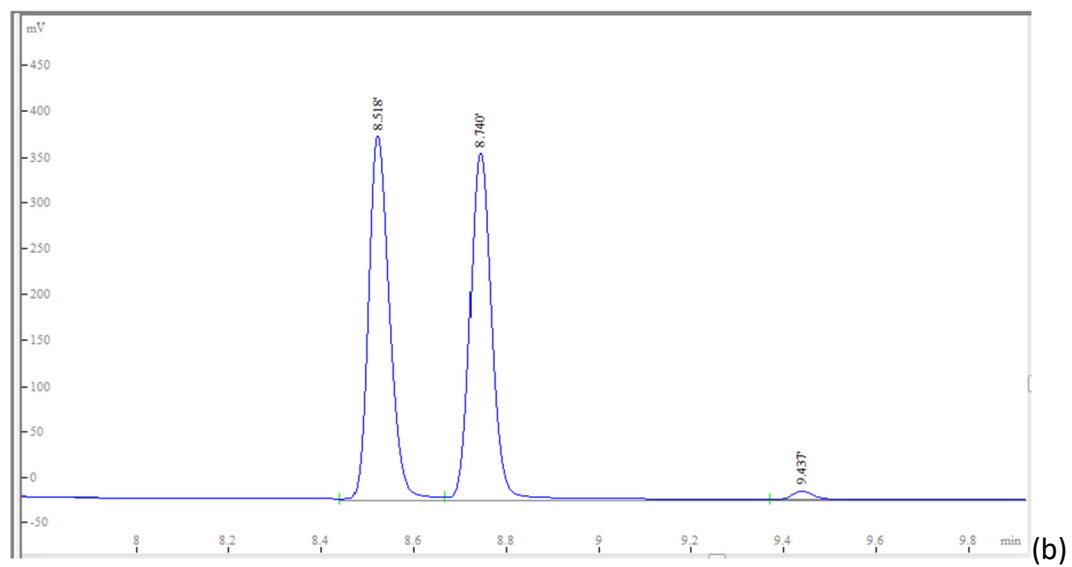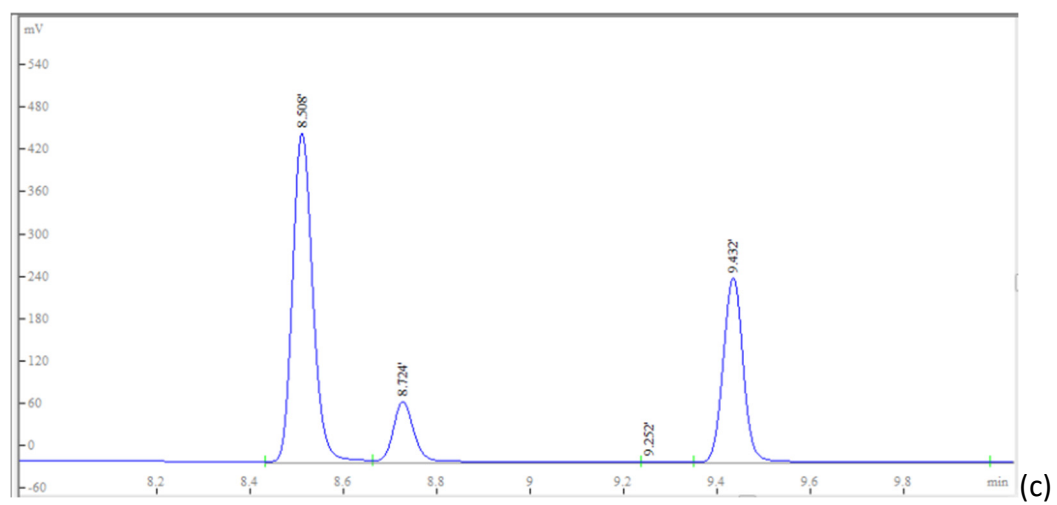

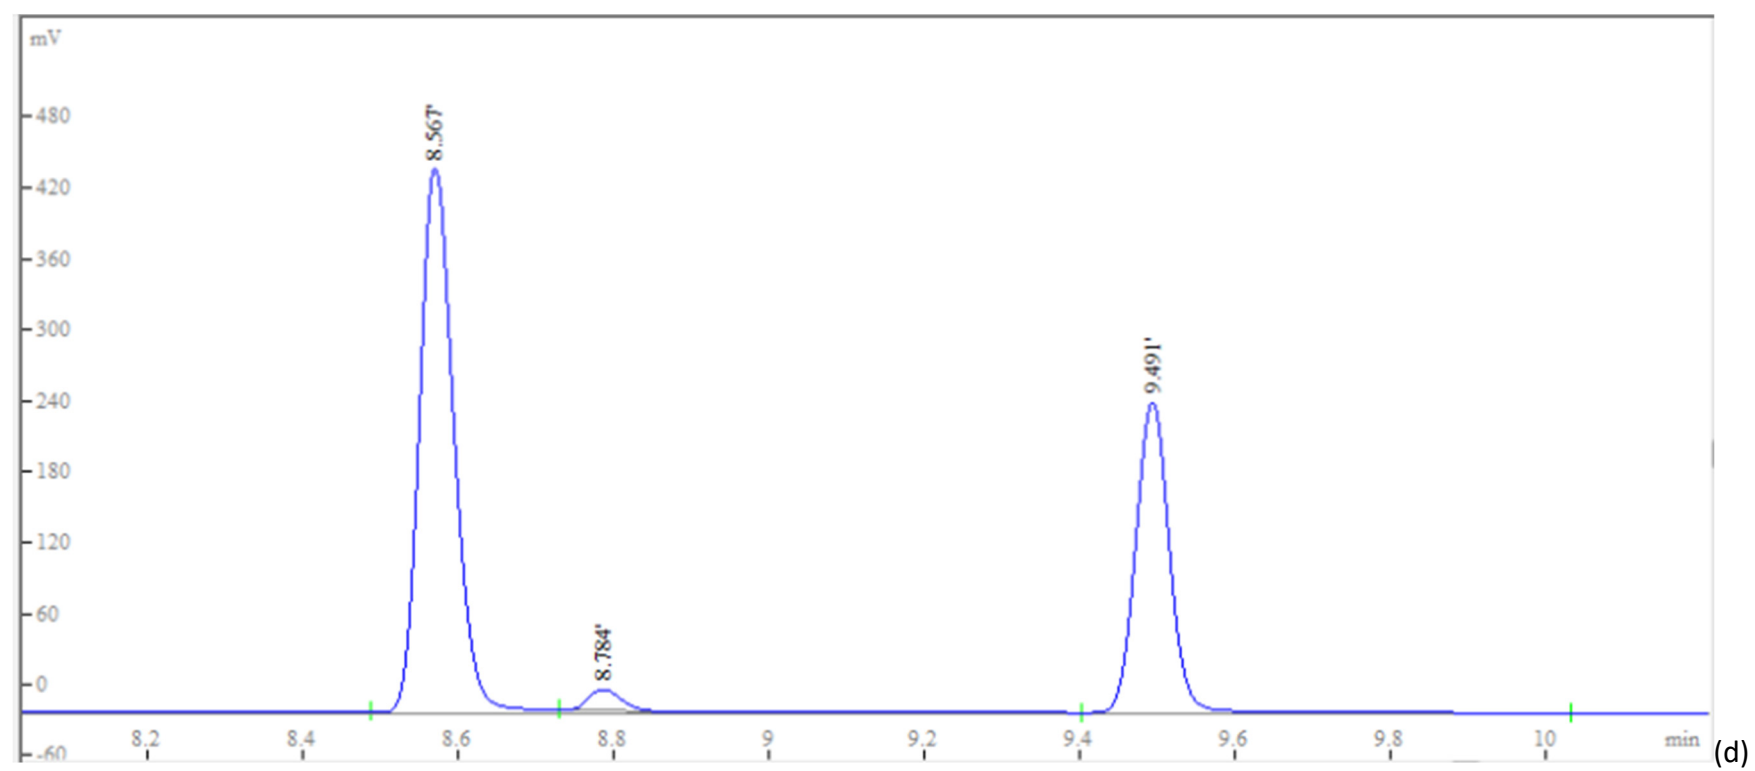

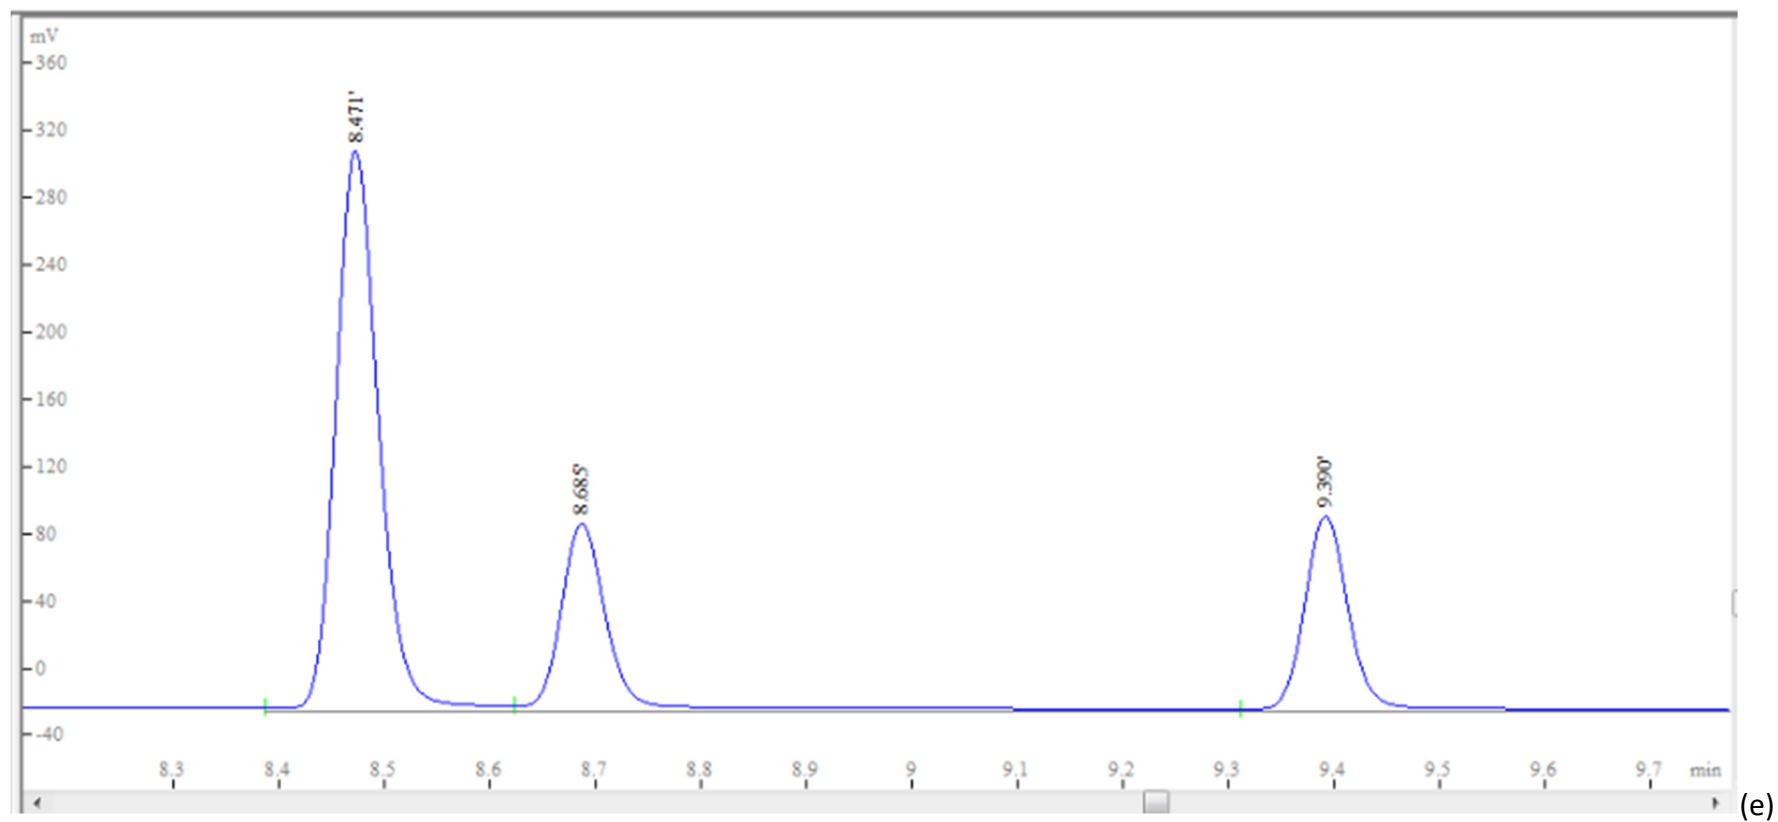

**Figure S6.** (a) A chromatogram of the reaction of entry 1 in table 1; (b) A chromatogram of the reaction of entry 2 in table 1; (c) A chromatogram of the reaction of entry 3 in table 1; (d) A chromatogram of the reaction of entry 4 in table 1; (e) A chromatogram of the reaction of entry 5 in table 1;
